# Supplementary material for: Different Dimensions of the Home Food Environment May Be Associated with the Body Mass Index of Older Adults: A Cross-Sectional Survey Conducted in Beijing, China
Source: MDPI journal article supplement (doi:10.3390/nu16020289), 2024-01-18
Supplement: s1 [file s1]

## Supplementary S1

### Questionnaire on basic information and Home food availability

Hello, dear residents!

Please answer the following questions independently and truthfully. There is no right or wrong answer, each of your answers is very important to us. At the same time, we will keep you confidential, please fill in truthfully according to your own real thoughts. Thank you for your cooperation!

### Basic Information

1. Your address: \_\_\_\_\_ District \_\_\_\_\_ Street \_\_\_\_\_ Community
2. Your gender: ① Male ② Female
3. Your age: \_\_\_\_\_ years old
4. Height: \_\_\_\_\_ meters (Must be filled out by the investigator after measurement)
5. Weight: \_\_\_\_\_ kg (Must be filled out by the investigator after measurement)
6. Your highest education level:
  - ① Master's degree and above ② University or college
  - ③ Secondary technical school, vocational school ④ High school
  - ⑤ Junior high school ⑥ Elementary school
  - ⑦ Did not graduate from elementary school ⑧ Did not go to school
7. Your marital status:
  - ① unmarried ② married ③ widowed ④ divorced or separated
8. What is the monthly income per capita in RMB (after tax) of your family?
  - ① Below 2000 ② 2000-3500 ③ 3500-5000
  - ④ 5000-6500 ⑤ 6500-10000 ⑥ 10,000 and above
9. Who have you been living with in the past year? (Multiple choices are allowed)
  - ① Living alone ② Living with spouse ③ Living with children
  - ④ Other (please specify: \_\_\_\_\_)
10. What was your longest career before retirement
  - ① Senior professional and technical workers (doctors, professors, lawyers, architects, engineers, etc.)
  - ② General professional and technical workers (midwives, nurses, teachers, editors, photographers, etc.)
  - ③ Managers/administrative officials/managers (factory directors, government officials, directors, administrative officials, etc.)
  - ④ General office staff (secretaries, clerks)
  - ⑤ Production personnel in agriculture, forestry, animal husbandry, fishing, and water conservancy industries
  - ⑥ Workers (section leaders, team leaders, craftsmen, ordinary workers, lumberjacks, etc.)
  - ⑦ Officer
  - ⑧ Soldiers and Police

- ⑨ Service industry personnel (drivers, chefs, waiters, gatekeepers, barbers, salespeople, etc.)
- ⑩ Athletes, actors, performers
- ⑪ Other (please specify: \_\_\_\_\_)
11. In the past month, how often did you exercise? (Walking, running, dancing, ball games, etc.)  
 ① Never ② 1-2 times a week ③ 3-4 times a week ④ 5-6 times a week ⑤ every day
12. Do you smoke?  
 ① Never smoked ② keep smoking, never tried to quit smoking  
 ③ have failed to quit smoking ④ have quit smoking
13. How often did you drink alcohol in the past year?  
 ① Drink almost every day ② 3-4 times a week ③ 1-2 times a week  
 ④ 1-3 times a month ⑤ Less than once a month ⑥ Never

### **Food intake information**

14. Have you eaten this kind of food in the past three days?

|                         |          |
|-------------------------|----------|
| Cereals                 | ①Yes ②No |
| Vegetables              | ①Yes ②No |
| Fruits                  | ①Yes ②No |
| Animal meat             | ①Yes ②No |
| Fish and shrimp         | ①Yes ②No |
| Eggs                    | ①Yes ②No |
| Milk and dairy products | ①Yes ②No |
| Beans and soy products  | ①Yes ②No |
| Oil and fat             | ①Yes ②No |

### **Home food availability**

15. How frequently are the following food items available in your home?
- |                  |                                                           |
|------------------|-----------------------------------------------------------|
| Fresh fruits     | ①always ②most of the time ③sometimes ④occasionally ⑤never |
| Fresh vegetables | ①always ②most of the time ③sometimes ④occasionally ⑤never |
| Dairy products   | ①always ②most of the time ③sometimes ④occasionally ⑤never |
| Coarse grains    | ①always ②most of the time ③sometimes ④occasionally ⑤never |
| Salted snacks    | ①always ②most of the time ③sometimes ④occasionally ⑤never |
| Sugary beverages | ①always ②most of the time ③sometimes ④occasionally ⑤never |
| Preserved food   | ①always ②most of the time ③sometimes ④occasionally ⑤never |
| Fried foods      | ①always ②most of the time ③sometimes ④occasionally ⑤never |
